# Supplementary material
Source: Springer Nature journal article supplement (https://www.springermedizin.de/resource/supplementary/12986_2010_245_MOESM3_ESM.pdf/25655668)
Supplement: MOESM3 [file 25655668]

**Blood Glucose (mmol/L)**

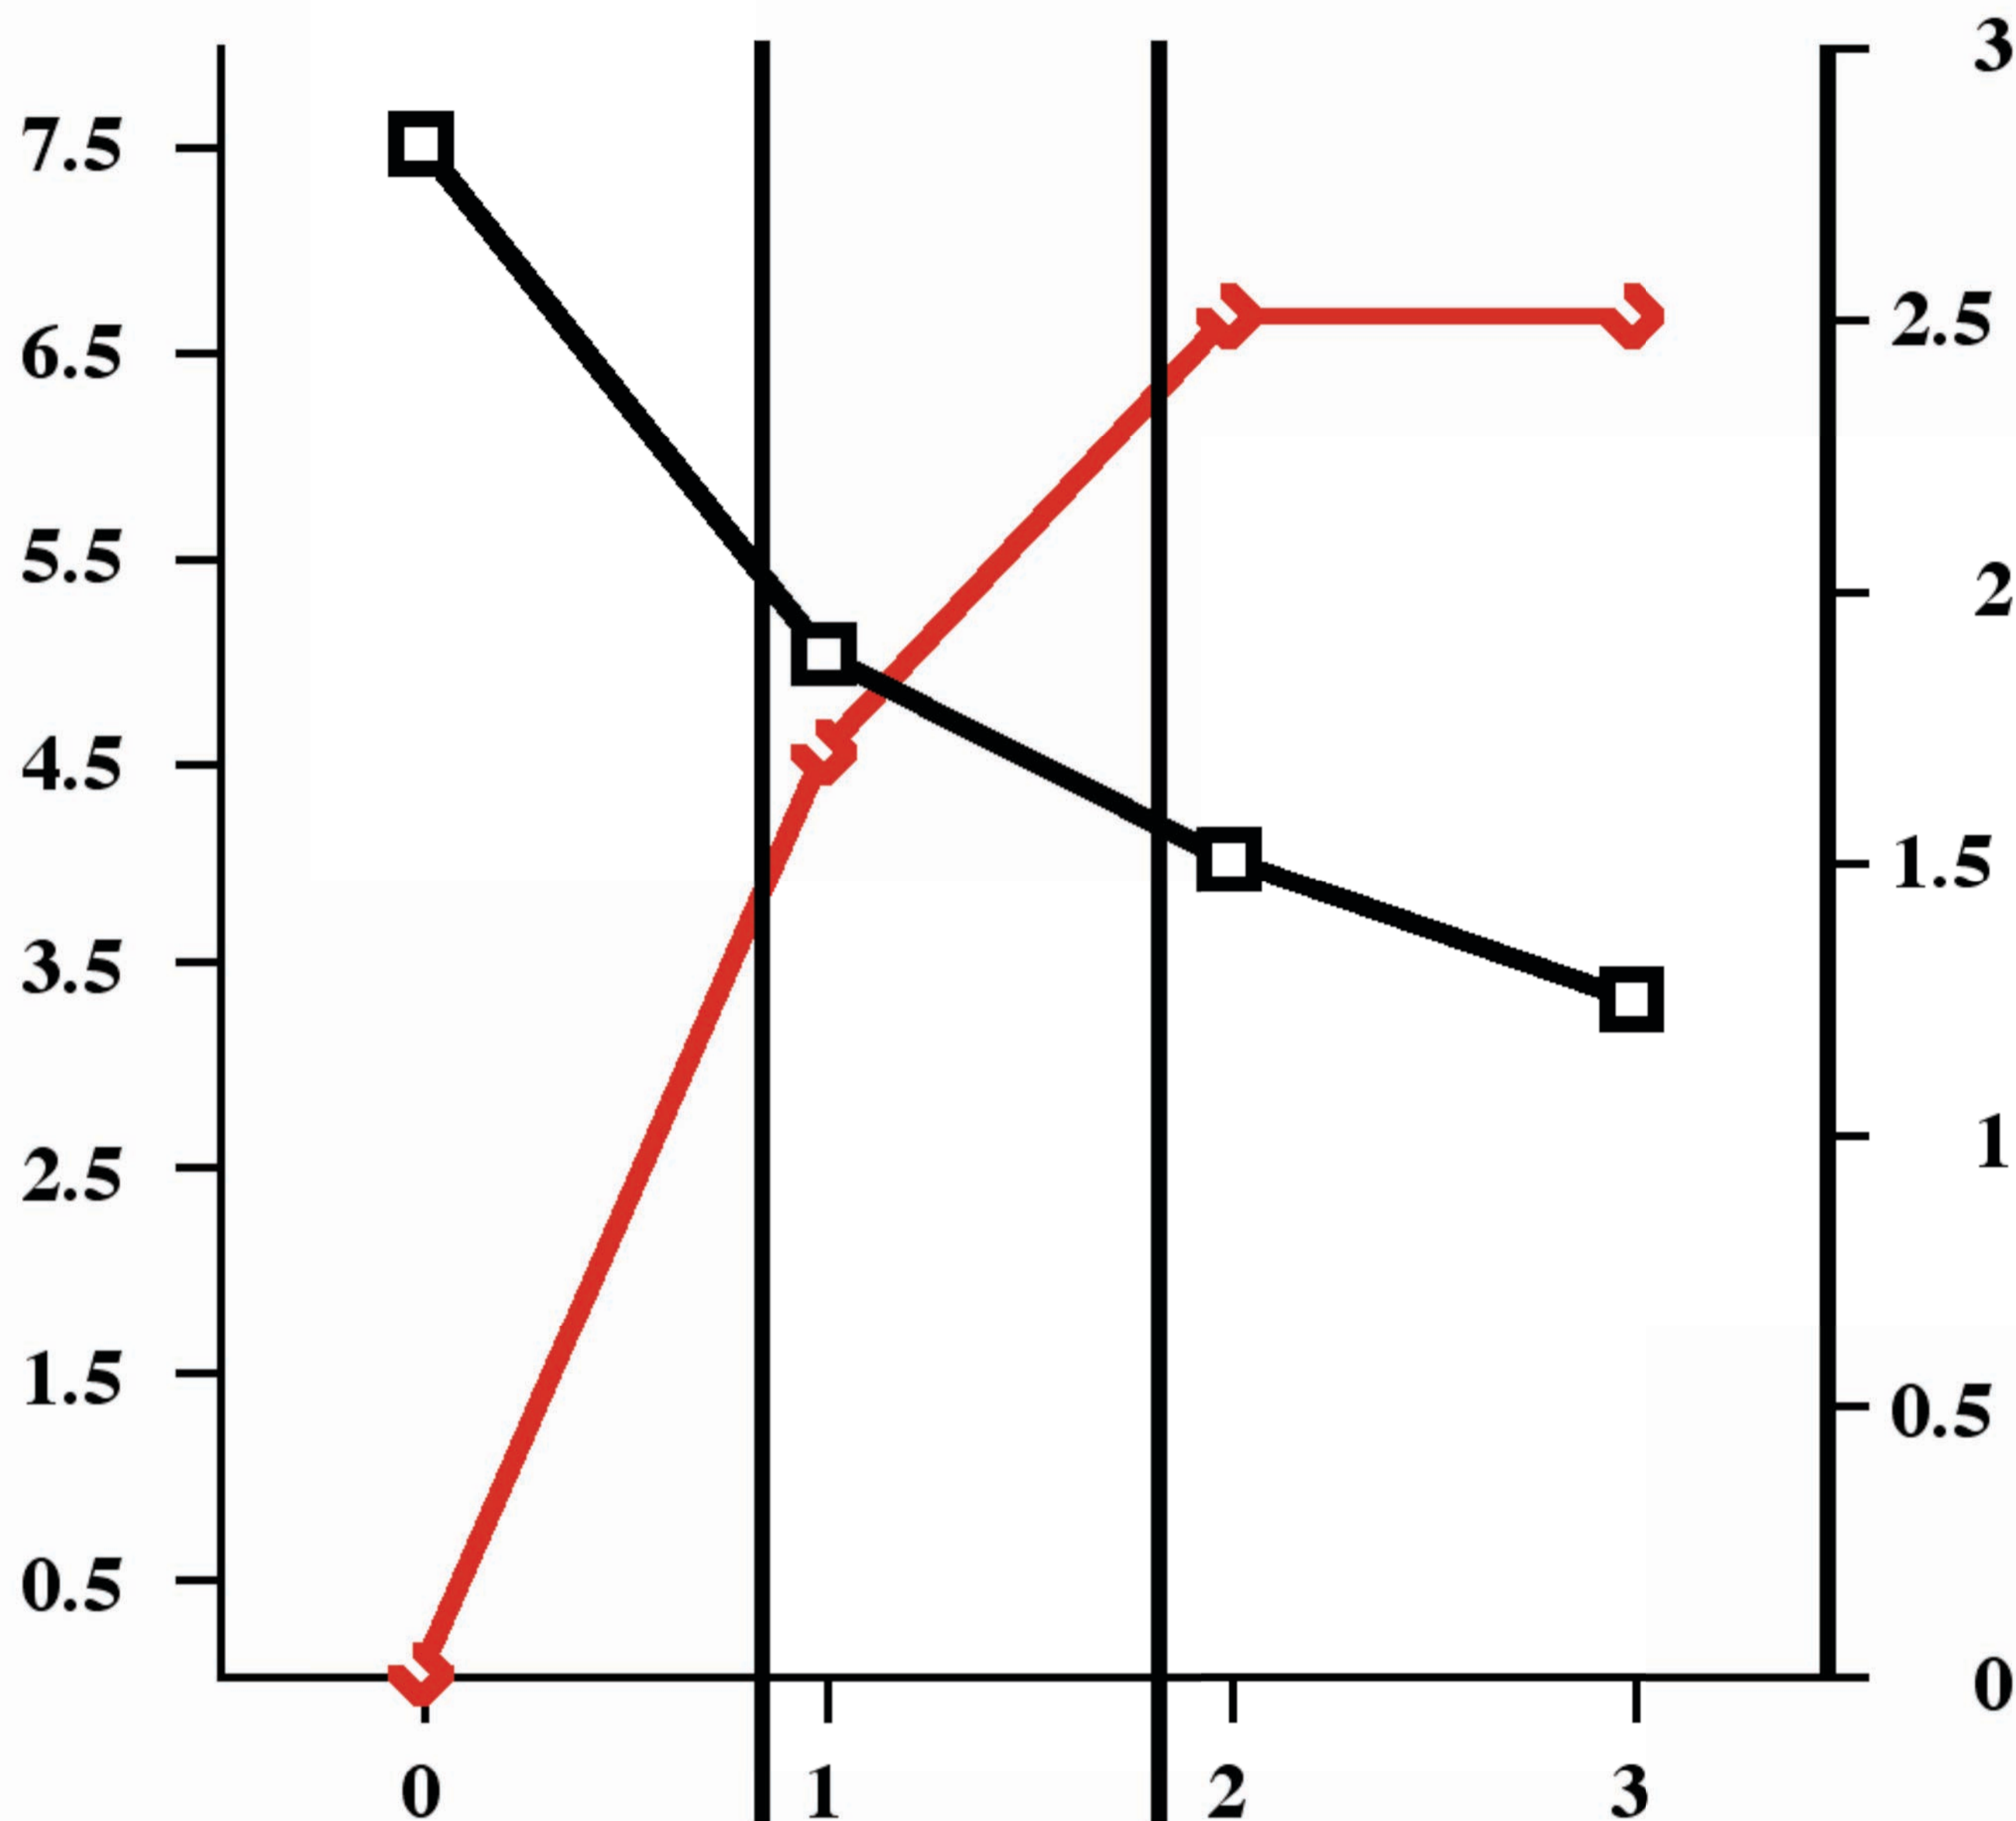

**Before  
Fast/diet**

**First  
fast**

**Second  
fast**

**Restricted  
ketogenic diet**

**weeks**

**Urinary Ketones (mmol/L)**
